# Supplementary material
Source: publisher site journal article supplement (https://neobiota.pensoft.net/article/86672/download/suppl/34/)
Supplement: Supplementary file 1

## Sheet: Sheet1
Supplementary Table S1: Results of one-way ANOVA examining the effect of autoclave time on soil characteristics. Electrical conductivity, phosphorus, and sulfur were log-transformed prior to analysis.
Soil characteristics	F-statistic	p
pH	F1,16 = 0.35	0.5648
Electrical conductivity	F1,16 = 12.08	0.0031
Nitrate	F1,16 = 0.02	0.8937
Phosphorus	F1,16 = 13.83	0.0019
Potassium	F1,16 = 0.13	0.7279
Magnesium	F1,16 = 0.92	0.3513
Sulfur	F1,16 = 29.28	0.0001
Sodium	F1,16 = 7.92	0.0125
Calcium	F1,16 = 0.01	0.9277
